# Supplementary material for: Energyscapes and prey fields shape a North Atlantic seabird wintering hotspot under climate change
Source: PubMed Central journal article supplement (PMC5792952; doi:10.1098/rsos.171883), 2018-01-17
Supplement: rsos171883supp3.pdf [file rsos171883supp3.pdf]

**Energyscapes and prey fields shape a North Atlantic seabird wintering hotspot under climate change.** Amélineau F., Fort J., Mathewson P.D., Speirs D.C., Courbin N., Perret S., Porter W.P., Wilson R.J., Grémillet D. **Royal Society Open Science.**

**ESM file 3: Results of the sensitivity analysis in Niche Mapper<sup>TM</sup> for the daily energy requirements of little auks in November, December, January and February.**

| Vaname                      | Range   | Variation of energy requirements (%) |
|-----------------------------|---------|--------------------------------------|
| body T                      | ±10%    | -2.56                                |
| plumage reflectivity        | ±10%    | 0                                    |
| feather length              | ±10%    | -1.63                                |
| feather diameter            | ±10%    | 0.61                                 |
| plumage density             | ±10%    | -0.98                                |
| plumage depth               |         |                                      |
| activity E released at heat | ±10%    | 0.5                                  |
| flight metabolism           | ±10%    | 0                                    |
| ventral area on water       | ±10%    | 0                                    |
| cloud cover                 | min-max | -0.45                                |
| relative humidity           | min-max | -0.16                                |
| SST                         | min-max | -11.4                                |
| Air temperature             | min-max | -8.54                                |
| wind                        | min-max | 0.89                                 |
